# Supplementary material
Source: publisher site journal article supplement (https://www.dovepress.com/get_supplementary_file.php?f=346675.docx)
Supplement: Supplementary file 1 [file get_supplementary_file.php]

**Supplementary file**

**Table S1 Respondents’ scores on IMB scale questions a, b**

| Constructs | Items | Mean | SD |
| --- | --- | --- | --- |
| **Information (In)** | **In1.** Physicians can register multiple online medical platforms for practice at the same time | 2.82 | 1.04 |
| **In2.** Physicians can use online medical platforms to provide patients with medical services (i.e., disease consultation, chronic disease management, and telemedicine) | 3.39 | 0.92 |
| **In3.** The online medical platform requires registration, real-name certification, uploading of relevant practicing qualification certificates, etc. | 3.62 | 1.06 |
| **In4.** Physicians should have more than 3 years of independent work experience to provide online medical services to patients. | 3.07 | 1.10 |
| **Motivation (Mo)** | **Mo1.** I think performing online medical services can broaden my medical business | 3.39 | 0.98 |
| **Mo2.** I think using online medical services can bring me more patient resources | 3.49 | 0.92 |
| **Mo3.** Some important people encourage me to use online medical services | 3.15 | 0.96 |
| **Mo4.** Hospital or medical institution encourages doctors to provide online medical services | 3.23 | 0.98 |
| **Behavioral skills (BS)** | **BS1.** I can operate the online medical platform proficiently | 3.30 | 1.07 |
| **BS2.** I have the ability to coordinate online medical and offline medical working hours | 3.20 | 1.00 |
| **BS3.** I have the ability to independently use online medical services to provide diagnosis and treatment services for patients | 3.38 | 1.01 |
| **BS4.** I have the confidence and ability to solve the difficulties during performing online medical services | 3.25 | 0.98 |
| **Adoption willingness (AW)** | **AW1.** I will provide online medical services to patients when needed | 3.55 | 0.94 |
| **AW2.** I would recommend others (e.g., peers, patients) to use online health services when needed | 3.51 | 0.94 |
| **AW3.** I have a high probability of using online medical services in the future | 3.59 | 0.93 |
| **AW4.** I think online health services are an indispensable part of my work | 3.17 | 1.00 |

**Note.** a In the “Information” construct, participants need to choose an answer for each item, with answer options of “Absolutely unknown”, “Unknown”, “A little known”, “Mostly known”, “Absolutely known”. For the items of the remaining constructs, the answer options are “Absolutely disagree”, “Disagree”, “A little agree”, “Mostly agree”, and “Absolutely agree”. b The answers were scored with the Likert’s scale. The score range of each item was 1 to 5.

**Table S2 Confirmatory factor analysis for measurement model of IMB constructs**

| Items | | Parameter significance estimation | | | | Factor loading | Item reliability | Composite reliability | Convergent validity |
| --- | --- | --- | --- | --- | --- | --- | --- | --- | --- |
| Unstd | S.E. | t-palue | P | Std | SMC | CR | AVE |
| In | In1 | 1.000 |  |  |  | 0.678 | 0.460 | 0.805 | 0.509 |
|  | In2 | 1.015 | 0.070 | 14.568 | *** | 0.777 | 0.604 |  |  |
|  | In3 | 1.134 | 0.080 | 14.248 | *** | 0.751 | 0.564 |  |  |
|  | In4 | 0.994 | 0.079 | 12.536 | *** | 0.639 | 0.408 |  |  |
| Mo | Mo1 | 1.000 |  |  |  | 0.778 | 0.605 | 0.882 | 0.653 |
|  | Mo2 | 1.066 | 0.049 | 21.569 | *** | 0.875 | 0.766 |  |  |
|  | Mo3 | 1.031 | 0.049 | 21.212 | *** | 0.861 | 0.741 |  |  |
|  | Mo4 | 0.894 | 0.053 | 16.776 | *** | 0.706 | 0.498 |  |  |
| BS | BS1 | 1.000 |  |  |  | 0.740 | 0.548 | 0.903 | 0.700 |
|  | BS2 | 1.103 | 0.056 | 19.527 | *** | 0.841 | 0.707 |  |  |
|  | BS3 | 1.165 | 0.057 | 20.414 | *** | 0.877 | 0.769 |  |  |
|  | BS4 | 1.135 | 0.055 | 20.476 | *** | 0.880 | 0.774 |  |  |
| AW | AW1 | 1.000 |  |  |  | 0.830 | 0.689 | 0.926 | 0.759 |
|  | AW2 | 1.074 | 0.041 | 26.453 | *** | 0.902 | 0.814 |  |  |
|  | AW3 | 1.008 | 0.040 | 25.290 | *** | 0.878 | 0.771 |  |  |
|  | AW4 | 1.055 | 0.042 | 25.063 | *** | 0.873 | 0.762 |  |  |

**Note:** **p*<0.05, ***p*<0.01, ****p*<0.001

**Abbreviations:** Std, standardized coefficient; Unstd, unstandardized coefficient; S.E., standard error; SMC, squared multiple correlation; CR, composite reliability; AVE, average variance extracted; In, information; Mo, motivation; BS, behavioral skills; AW, adoption willingness
